# Supplementary material for: CS2-based one-pot multicomponent tandem polymerization toward functional polybenzothiazoles
Source: Royal Society of Chemistry journal article supplement (doi:10.1039/d3py01406a), 2024-01-01
Supplement: d3py01406a1.pdf [file d3py01406a1.pdf]

## Electronic Supporting Information (ESI)

# CS<sub>2</sub>-Based one-pot multicomponent tandem polymerization toward functional polybenzothiazoles

*Dongming Liu,<sup>a</sup> Haoran Zhang,<sup>a</sup> Lijing Zhang,<sup>a</sup> Jia Wang,<sup>\*b</sup> Zhiyang Chang<sup>\*a</sup> and Hailin Cong<sup>\*a</sup>*

<sup>a</sup>School of Materials Science and Engineering, Shandong University of Technology, Zibo 255000, China. E-mail: [conghailin@sdut.edu.cn](mailto:conghailin@sdut.edu.cn), [zychang2011@126.com](mailto:zychang2011@126.com)

<sup>b</sup>Songshan Lake Materials Laboratory, Dongguan 523808, China. E-mail: [wangjia@sslslab.org.cn](mailto:wangjia@sslslab.org.cn)

## Table of Contents

|                                                                                                                                                                                                             |     |
|-------------------------------------------------------------------------------------------------------------------------------------------------------------------------------------------------------------|-----|
| <b>Scheme S1</b> Synthetic route to model compound <b>3</b> .                                                                                                                                               | S4  |
| <b>Scheme S2</b> Three-component polymerization of CS <sub>2</sub> , <b>1a</b> and <b>2</b> .                                                                                                               | S4  |
| <b>Formula S1</b> The calculation formula of polymer yields.                                                                                                                                                | S4  |
| <b>Table S1</b> Effect of solvent on the polymerization of CS <sub>2</sub> , <b>1a</b> and <b>2</b> .                                                                                                       | S4  |
| <b>Table S2</b> Effect of CuCl <sub>2</sub> •2H <sub>2</sub> O loading on the polymerization of CS <sub>2</sub> , <b>1a</b> and <b>2</b> .                                                                  | S5  |
| <b>Table S3</b> Effect of K <sub>2</sub> CO <sub>3</sub> loading on the polymerization of CS <sub>2</sub> , <b>1a</b> and <b>2</b> .                                                                        | S5  |
| <b>Table S4</b> Effect of monomer concentration on the polymerization of CS <sub>2</sub> , <b>1a</b> and <b>2</b> .                                                                                         | S5  |
| <b>Table S5</b> Effect of temperature on the polymerization of CS <sub>2</sub> , <b>1a</b> and <b>2</b> .                                                                                                   | S6  |
| <b>Table S6</b> Effect of CS <sub>2</sub> loading on the polymerization of CS <sub>2</sub> , <b>1a</b> and <b>2</b> .                                                                                       | S6  |
| <b>Table S7</b> Time course of the polymerization of CS <sub>2</sub> , <b>1a</b> and <b>2</b> .                                                                                                             | S6  |
| <b>Fig. S1</b> The GPC curves of P <b>1a</b> /2/CS <sub>2</sub> -P <b>1f</b> /2/CS <sub>2</sub> .                                                                                                           | S7  |
| <b>Fig. S2</b> FT-IR spectra of monomers <b>1a</b> (A) and <b>2</b> (B), and P <b>1a</b> /2/CS <sub>2</sub> .                                                                                               | S7  |
| <b>Fig. S3</b> FT-IR spectra of monomers <b>1b</b> (A) and <b>2</b> (B), and P <b>1b</b> /2/CS <sub>2</sub> .                                                                                               | S8  |
| <b>Fig. S4</b> FT-IR spectra of monomers <b>1c</b> (A) and <b>2</b> (B), and P <b>1c</b> /2/CS <sub>2</sub> .                                                                                               | S8  |
| <b>Fig. S5</b> FT-IR spectra of monomers <b>1e</b> (A) and <b>2</b> (B), and P <b>1e</b> /2/CS <sub>2</sub> .                                                                                               | S9  |
| <b>Fig. S6</b> FT-IR spectra of monomers <b>1f</b> (A) and <b>2</b> (B), and P <b>1f</b> /2/CS <sub>2</sub> .                                                                                               | S9  |
| <b>Fig. S7</b> <sup>1</sup> H NMR spectra of monomers <b>1a</b> (A) and <b>2</b> (B), and P <b>1a</b> /2/CS <sub>2</sub> (C) in DMSO- <i>d</i> <sub>6</sub> . The solvent peaks are marked with asterisks.  | S10 |
| <b>Fig. S8</b> <sup>13</sup> C NMR spectra of monomers <b>1a</b> (A) and <b>2</b> (B), and P <b>1a</b> /2/CS <sub>2</sub> (C) in DMSO- <i>d</i> <sub>6</sub> . The solvent peaks are marked with asterisks. | S10 |

- Fig. S9**  $^1\text{H}$  NMR spectra of monomers **1b** (A) and **2** (B), and **P1b/2/CS<sub>2</sub>** (C) in DMSO-*d*<sub>6</sub>. The solvent peaks are marked with asterisks. S11
- Fig. S10**  $^{13}\text{C}$  NMR spectra of monomers **1b** (A) and **2** (B), and **P1b/2/CS<sub>2</sub>** (C) in DMSO-*d*<sub>6</sub>. The solvent peaks are marked with asterisks. S11
- Fig. S11**  $^1\text{H}$  NMR spectra of monomers **1c** (A) and **2** (B), and **P1c/2/CS<sub>2</sub>** (C) in DMSO-*d*<sub>6</sub>. The solvent peaks are marked with asterisks. S12
- Fig. S12**  $^{13}\text{C}$  NMR spectra of monomers **1c** (A) and **2** (B), and **P1c/2/CS<sub>2</sub>** (C) in DMSO-*d*<sub>6</sub>. The solvent peaks are marked with asterisks. S12
- Fig. S13**  $^1\text{H}$  NMR spectra of monomers **1e** (A) and **2** (B), and **P1e/2/CS<sub>2</sub>** (C) in DMSO-*d*<sub>6</sub>. The solvent peaks are marked with asterisks. S13
- Fig. S14**  $^{13}\text{C}$  NMR spectra of monomers **1e** (A) and **2** (B), and **P1e/2/CS<sub>2</sub>** (C) in DMSO-*d*<sub>6</sub>. The solvent peaks are marked with asterisks. S13
- Fig. S15**  $^1\text{H}$  NMR spectra of monomers **1f** (A) and **2** (B), and **P1f/2/CS<sub>2</sub>** (C) in DMSO-*d*<sub>6</sub>. The solvent peaks are marked with asterisks. S14
- Fig. S16**  $^{13}\text{C}$  NMR spectra of monomers **1f** (A) and **2** (B), and **P1f/2/CS<sub>2</sub>** (C) in DMSO-*d*<sub>6</sub>. The solvent peaks are marked with asterisks. S14
- Fig. S17** S 2p XPS of model compound **3** and **P1d/2/CS<sub>2</sub>**. S15
- Fig. S18** DSC curves of the PBTs recorded under nitrogen. S15
- Fig. S19** PL spectra of **P1b/2/CS<sub>2</sub>** in DMSO/water mixtures with different water fractions ( $f_w$ ). Solution concentration: 10  $\mu\text{M}$ ; excitation wavelength: 350 nm. S16

**Scheme S1** Synthetic route to model compound **3**.

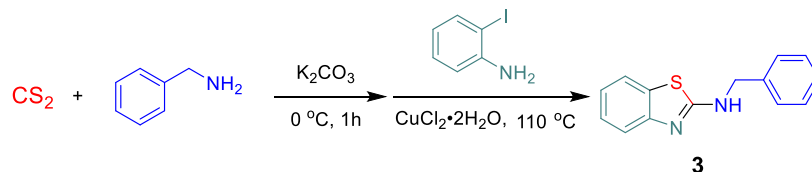

**Scheme S2** The three-component polymerization of CS<sub>2</sub>, **1a** and **2**.

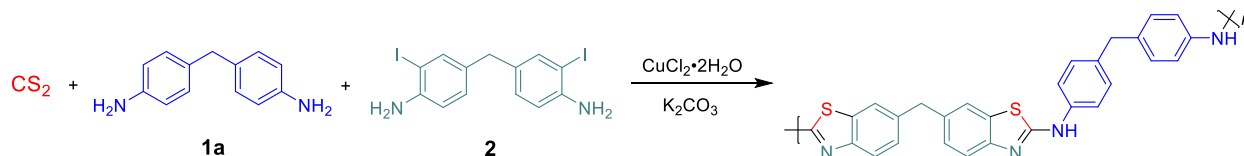

**Formula S1** The calculation formula of polymer yields.

$$yield = \frac{m_a}{m_t} \times 100\% = \frac{m_a}{n \times (2M_{CS_2} + M_1 - 2M_H + 2M_K + M_2) - (2n-1)M_{KI} - (2n-1)M_{H_2S}} \times 100\%^a$$

<sup>a</sup>Where  $m_a$  is the actual mass of the polymer,  $m_t$  is theoretical mass of the polymer,  $n$  is the amount of substance of monomers, and  $M_{CS_2}$ ,  $M_1$ ,  $M_H$ ,  $M_K$ ,  $M_2$ ,  $M_{KI}$ ,  $M_{H_2S}$  are the molar mass of CS<sub>2</sub>, monomer **1**, H atom, K atom, monomer **2**, KI and H<sub>2</sub>S.

**Table S1** Effect of solvent on the polymerization of CS<sub>2</sub>, **1a** and **2**<sup>a</sup>.

| Entry          | Solvent         | Yield (%)  | $M_n^b$ | $M_w^b$ | $D^b$ |
|----------------|-----------------|------------|---------|---------|-------|
| 1 <sup>c</sup> | Toluene         | trace      | —       | —       | —     |
| 2 <sup>d</sup> | Chloroform      | No polymer |         |         |       |
| 3 <sup>d</sup> | Tetrahydrofuran | 23         | 4000    | 4800    | 1.2   |
| 4 <sup>c</sup> | 1, 4-Dioxane    | trace      | —       | —       | —     |
| 5              | DMSO            | 77         | 10 600  | 18 500  | 1.7   |
| 6              | DMF             | 84         | 8700    | 13 600  | 1.6   |
| 7              | DMAc            | 82         | 7000    | 10 300  | 1.5   |

<sup>a</sup>The first step of this MCTP was carried out at 30 °C for 1 h, and the second step was carried out at 100 °C for 16 h.  $[1a] = 0.15$  M,  $[1a]/[2]/[CS_2]/[CuCl_2 \cdot 2H_2O] / [K_2CO_3] = 1:1:2.4:3:2$ . <sup>b</sup> Determined by gel-permeation chromatography (GPC) using *N,N*-dimethylformamide (DMF) containing 0.05 M LiBr as an eluent on the basis of a linear polymethyl methacrylate (PMMA) calibration.  $D$  = polydispersity index ( $M_w/M_n$ ,  $M_w$  = weight-average molecular weight,  $M_n$  = number-average molecular weight). <sup>c</sup> 90 °C for 4 h. <sup>d</sup> 50 °C for 10 h.

**Table S2** Effect of CuCl<sub>2</sub>•2H<sub>2</sub>O loading on the polymerization of CS<sub>2</sub>, **1a** and **2**<sup>a</sup>.

| Entry | CuCl <sub>2</sub> •2H <sub>2</sub> O (equiv.) | Yield (%) | $M_n^b$ | $M_w^b$ | $D^b$ |
|-------|-----------------------------------------------|-----------|---------|---------|-------|
| 1     | 3                                             | 78        | 10 500  | 17 800  | 1.7   |
| 2     | 2                                             | 90        | 10 100  | 16 600  | 1.6   |
| 3     | 1                                             | 46        | 5300    | 6300    | 1.2   |

<sup>a</sup>The first step of this MCTP was carried out in DMSO at 30 °C for 1 h, and the second step was carried out in DMSO at 100 °C for 16 h. [1a] = 0.15 M, [1a]/[2]/[CS<sub>2</sub>]/[K<sub>2</sub>CO<sub>3</sub>] = 1:1:2.4:2. <sup>b</sup>Determined by GPC using DMF containing 0.05 M LiBr as an eluent on the basis of a linear PMMA calibration.  $D = M_w/M_n$ .

**Table S3** Effect of K<sub>2</sub>CO<sub>3</sub> loading on the polymerization of CS<sub>2</sub>, **1a** and **2**<sup>a</sup>.

| Entry | K <sub>2</sub> CO <sub>3</sub> (equiv.) | Yield (%) | $M_n^b$ | $M_w^b$ | $D^b$ |
|-------|-----------------------------------------|-----------|---------|---------|-------|
| 1     | 2                                       | 89        | 7500    | 16 500  | 2.2   |
| 2     | 1                                       | 88        | 7700    | 14 600  | 1.9   |
| 3     | 0.5                                     | 87        | 8000    | 13 300  | 1.7   |
| 4     | 0                                       | 81        | 6400    | 11 300  | 1.8   |

<sup>a</sup>The first step of this MCTP was carried out in DMSO at 30 °C for 1 h, and the second step was carried out in DMSO at 100 °C for 16 h. [1a] = 0.15 M, [1a]/[2]/[CS<sub>2</sub>]/[CuCl<sub>2</sub>•2H<sub>2</sub>O] = 1:1:2.4:2. <sup>b</sup>Determined by GPC using DMF containing 0.05 M LiBr as an eluent on the basis of a linear PMMA calibration.  $D = M_w/M_n$ .

**Table S4** Effect of monomer concentration on the polymerization of CS<sub>2</sub>, **1a** and **2**<sup>a</sup>.

| Entry          | [1a] (mol/L) | Yield (%) | $M_n^b$ | $M_w^b$ | $D^b$ |
|----------------|--------------|-----------|---------|---------|-------|
| 1              | 0.10         | 88        | 7600    | 12 800  | 1.7   |
| 2              | 0.15         | 89        | 8300    | 14 800  | 1.8   |
| 3 <sup>c</sup> | 0.30         | 87        | 11 000  | 23 200  | 2.1   |
| 4 <sup>c</sup> | 0.40         | Gel       | –       | –       | –     |

<sup>a</sup>The first step of this MCTP was carried out in DMSO at 30 °C for 1 h, and the second step was carried out in DMSO at 100 °C for 16 h. [1a]/[2]/[CS<sub>2</sub>]/[CuCl<sub>2</sub>•2H<sub>2</sub>O]/[K<sub>2</sub>CO<sub>3</sub>] = 1:1:2.4:2:1. <sup>b</sup>Determined by GPC using DMF containing 0.05 M LiBr as an eluent on the basis of a linear PMMA calibration.  $D = M_w/M_n$ . <sup>c</sup>For 10 h.

**Table S5** Effect of temperature on the polymerization of CS<sub>2</sub>, **1a** and **2**<sup>a</sup>.

| Entry | Temperature (°C) | Yield (%) | $M_n^b$ | $M_w^b$ | $\bar{D}^b$ |
|-------|------------------|-----------|---------|---------|-------------|
| 1     | 120              | 93        | 8900    | 33 600  | 3.8         |
| 2     | 100              | 88        | 7200    | 21 600  | 3.0         |
| 3     | 80               | 86        | 7000    | 10 800  | 1.5         |

<sup>a</sup> The first step of this MCTP was carried out in DMSO at 30 °C for 1 h, and the second step was carried out in DMSO for 10 h. [**1a**] = 0.3 M, [**1a**]/[**2**]/[CS<sub>2</sub>]/[CuCl<sub>2</sub>•2H<sub>2</sub>O]/[K<sub>2</sub>CO<sub>3</sub>] = 1:1:2.4:2:1.

<sup>b</sup> Determined by GPC using DMF containing 0.05 M LiBr as an eluent on the basis of a linear PMMA calibration.  $\bar{D} = M_w/M_n$ .

**Table S6** Effect of CS<sub>2</sub> loading on the polymerization of CS<sub>2</sub>, **1a** and **2**<sup>a</sup>.

| Entry | CS <sub>2</sub> (equiv.) | Yield (%) | $M_n^b$ | $M_w^b$ | $\bar{D}^b$ |
|-------|--------------------------|-----------|---------|---------|-------------|
| 1     | 2.2                      | 87        | 5500    | 9500    | 1.7         |
| 2     | 2.4                      | 92        | 12 900  | 32 000  | 2.5         |
| 3     | 2.6                      | 85        | 5100    | 7100    | 1.4         |

<sup>a</sup> The first step of this MCTP was carried out in DMSO at 30 °C for 1 h, and the second step was carried out in DMSO at 120 °C for 10 h. [**1a**] = 0.3 M, [**1a**]/[**2**]/[CuCl<sub>2</sub>•2H<sub>2</sub>O]/[K<sub>2</sub>CO<sub>3</sub>] = 1:1:2:1.

<sup>b</sup> Determined by GPC using DMF containing 0.05 M LiBr as an eluent on the basis of a linear PMMA calibration.  $\bar{D} = M_w/M_n$ .

**Table S7** Time course of the polymerization of CS<sub>2</sub>, **1a** and **2**<sup>a</sup>.

| Entry | Time (h) | Yield (%) | $M_n^b$ | $M_w^b$ | $\bar{D}^b$ |
|-------|----------|-----------|---------|---------|-------------|
| 1     | 2        | 35        | 4500    | 5400    | 1.2         |
| 2     | 4        | 58        | 6100    | 8300    | 1.4         |
| 3     | 6        | 87        | 9200    | 17 600  | 1.9         |
| 4     | 8        | 94        | 14 800  | 43 500  | 2.9         |
| 5     | 10       | 91        | 11 800  | 30 900  | 2.6         |

<sup>a</sup> The first step of this MCTP was carried out in DMSO at 30 °C for 1 h, and the second step was carried out in DMSO at 120 °C. [**1a**] = 0.3 M, [**1a**]/[**2**]/[CS<sub>2</sub>]/[CuCl<sub>2</sub>•2H<sub>2</sub>O]/[K<sub>2</sub>CO<sub>3</sub>] = 1:1:2.4:2:1.

<sup>b</sup> Determined by GPC using DMF containing 0.05 M LiBr as an eluent on the basis of a linear PMMA calibration.  $\bar{D} = M_w/M_n$ .

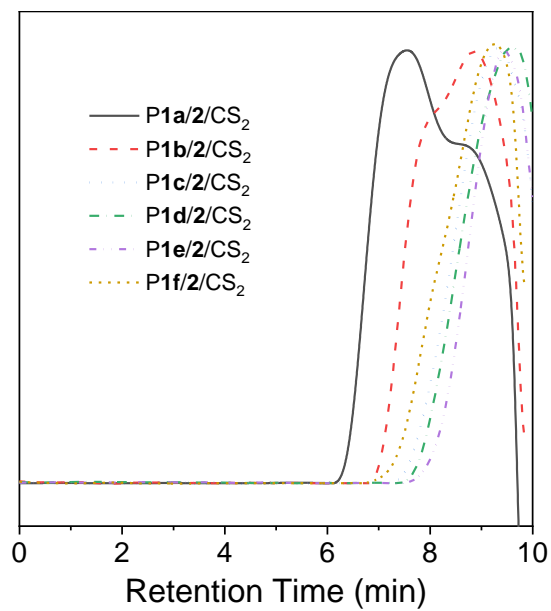

**Fig. S1** The GPC curves of P1a/2/CS<sub>2</sub>-P1f/2/CS<sub>2</sub>.

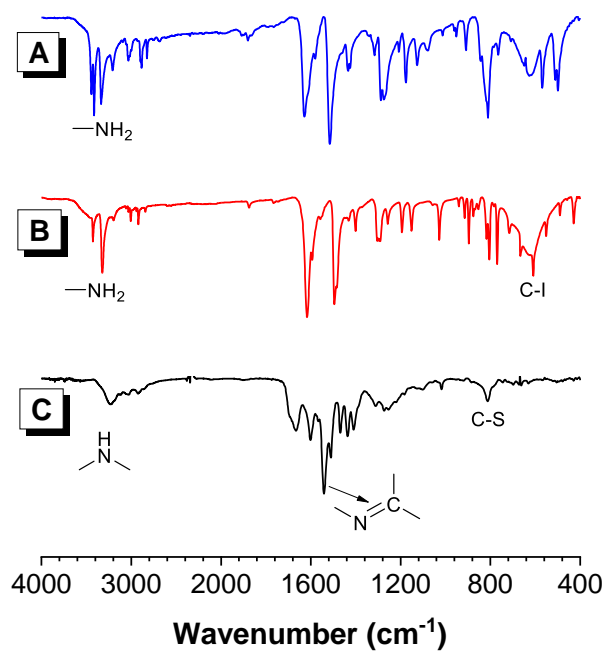

**Fig. S2** FT-IR spectra of monomers **1a** (A) and **2** (B), and P1a/2/CS<sub>2</sub> (C).

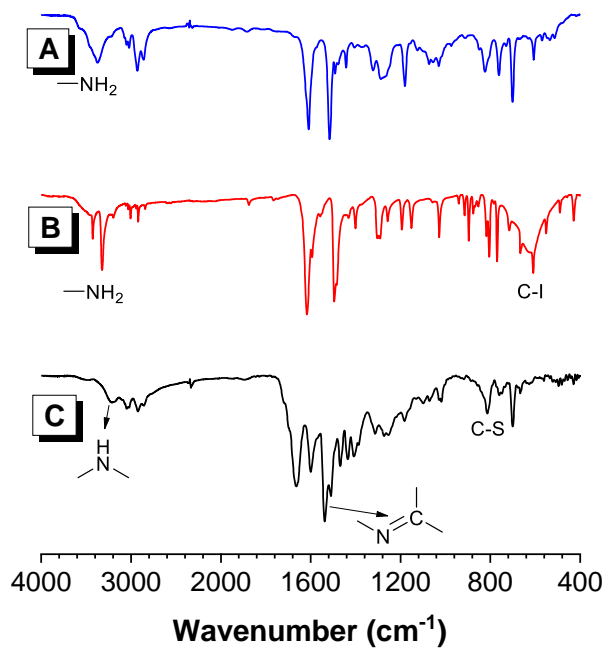

**Fig. S3** FT-IR spectra of monomers **1b** (A) and **2** (B), and **P1b/2/CS<sub>2</sub>** (C).

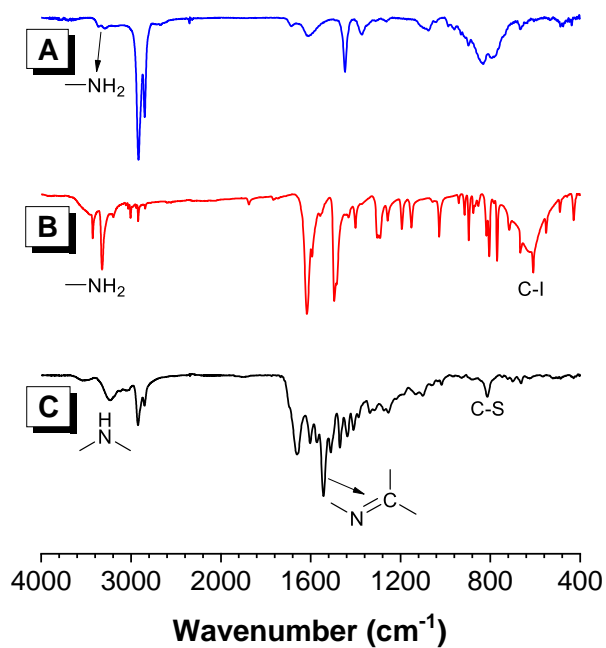

**Fig. S4** FT-IR spectra of monomers **1c** (A) and **2** (B), and **P1c/2/CS<sub>2</sub>** (C).



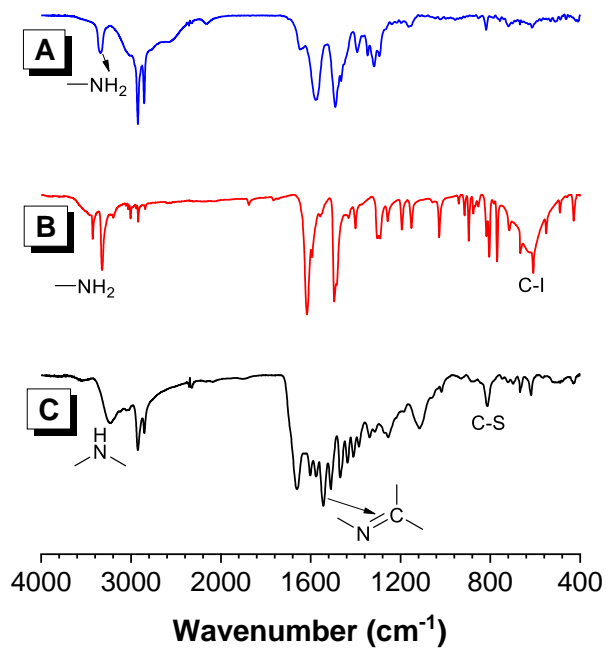

**Fig. S5** FT-IR spectra of monomers **1e** (A) and **2** (B), and **P1e/2/CS<sub>2</sub>** (C).

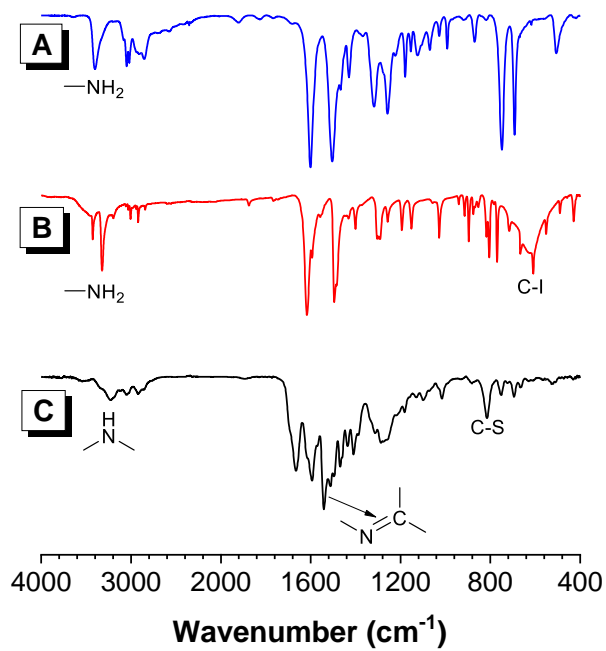

**Fig. S6** FT-IR spectra of monomers **1f** (A) and **2** (B), and **P1f/2/CS<sub>2</sub>** (C).

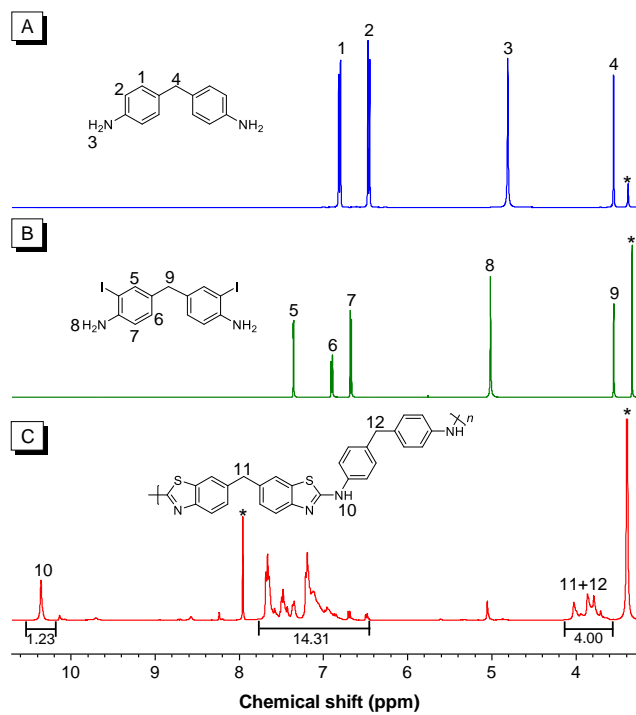

**Fig. S7**  $^1\text{H}$  NMR spectra of monomers **1a** (A) and **2** (B), and **P1a/2/CS<sub>2</sub>** (C) in  $\text{DMSO-}d_6$ . The solvent peaks are marked with asterisks.

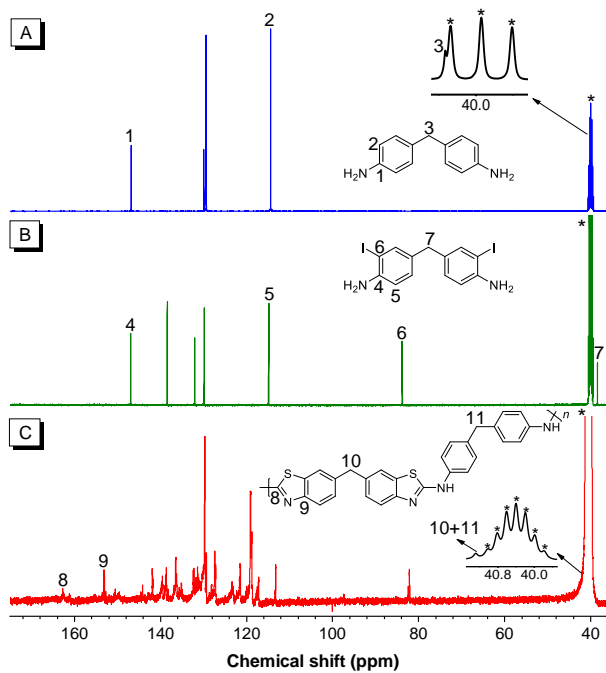

**Fig. S8**  $^{13}\text{C}$  NMR spectra of monomers **1a** (A) and **2** (B), and **P1a/2/CS<sub>2</sub>** (C) in  $\text{DMSO-}d_6$ . The solvent peaks are marked with asterisks.

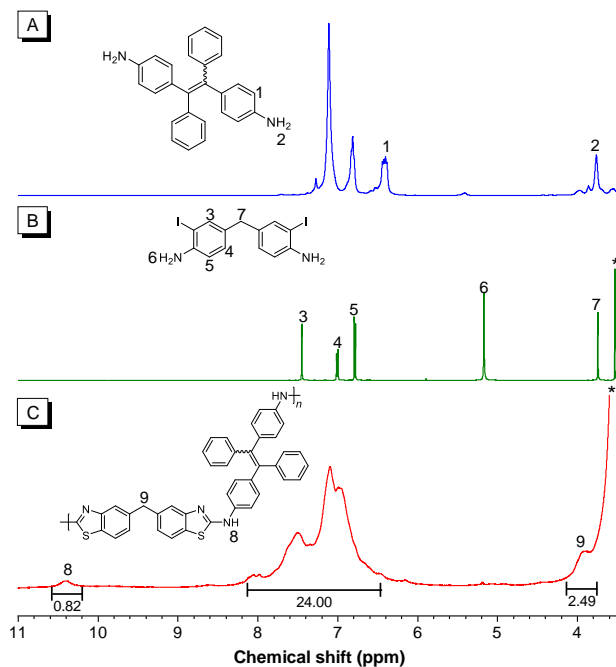

**Fig. S9**  $^1\text{H}$  NMR spectra of monomers **1b** (A) and **2** (B), and **P1b/2/CS<sub>2</sub>** (C) in  $\text{DMSO-}d_6$ . The solvent peaks are marked with asterisks.

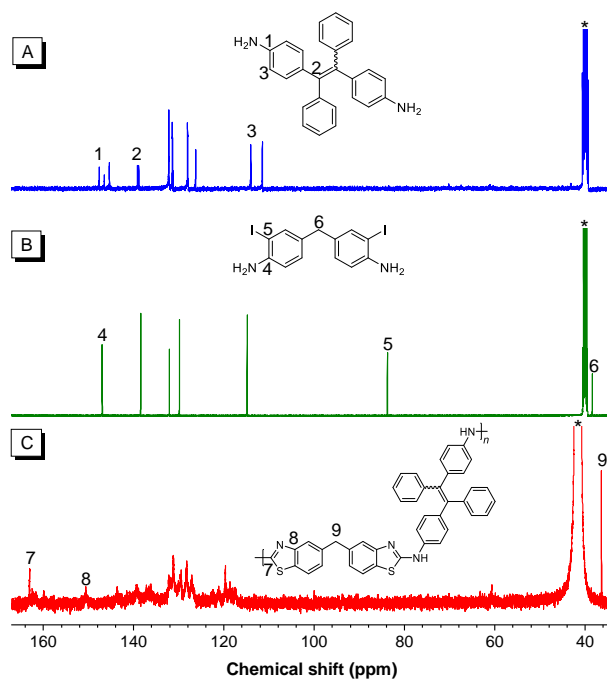

**Fig. S10**  $^{13}\text{C}$  NMR spectra of monomers **1b** (A) and **2** (B), and **P1b/2/CS<sub>2</sub>** (C) in  $\text{DMSO-}d_6$ . The solvent peaks are marked with asterisks.

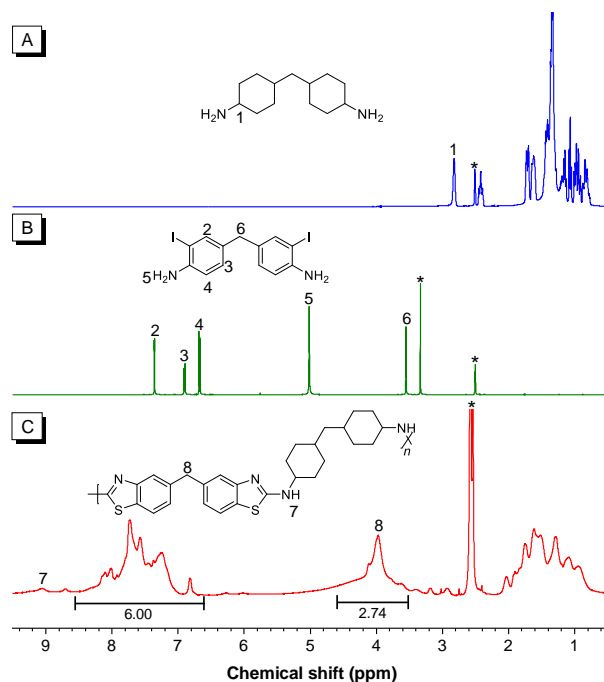

**Fig. S11**  $^1\text{H}$  NMR spectra of monomers **1c** (A) and **2** (B), and **P1c/2/CS<sub>2</sub>** (C) in  $\text{DMSO-}d_6$ . The solvent peaks are marked with asterisks.

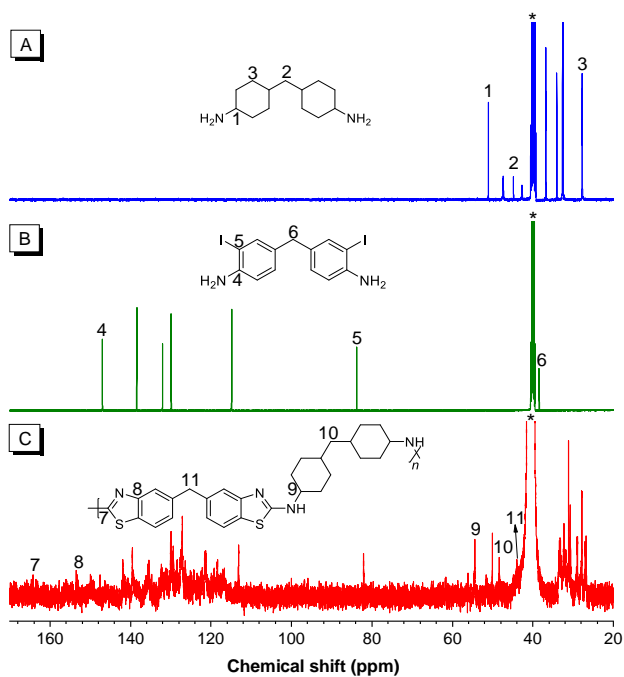

**Fig. S12**  $^{13}\text{C}$  NMR spectra of monomers **1c** (A) and **2** (B), and **P1c/2/CS<sub>2</sub>** (C) in  $\text{DMSO-}d_6$ . The solvent peaks are marked with asterisks.

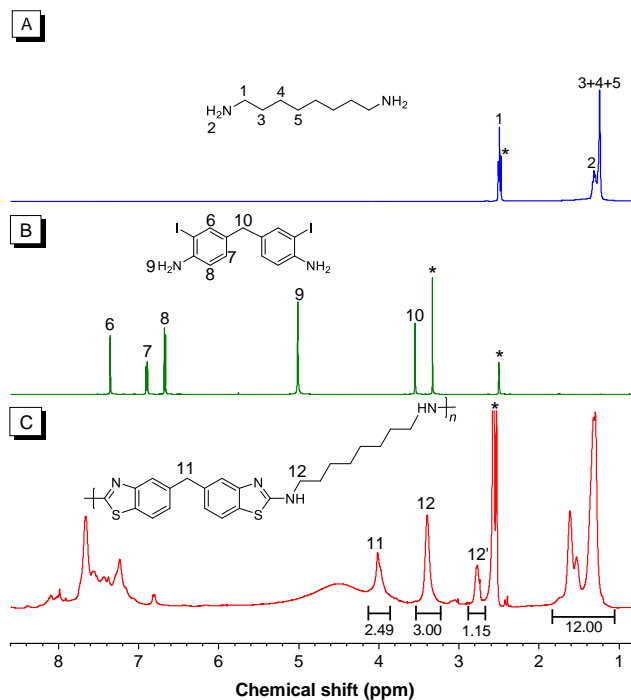

**Fig. S13**  $^1\text{H}$  NMR spectra of monomers **1e** (A) and **2** (B), and **P1e/2/CS<sub>2</sub>** (C) in  $\text{DMSO-}d_6$ . The solvent peaks are marked with asterisks.

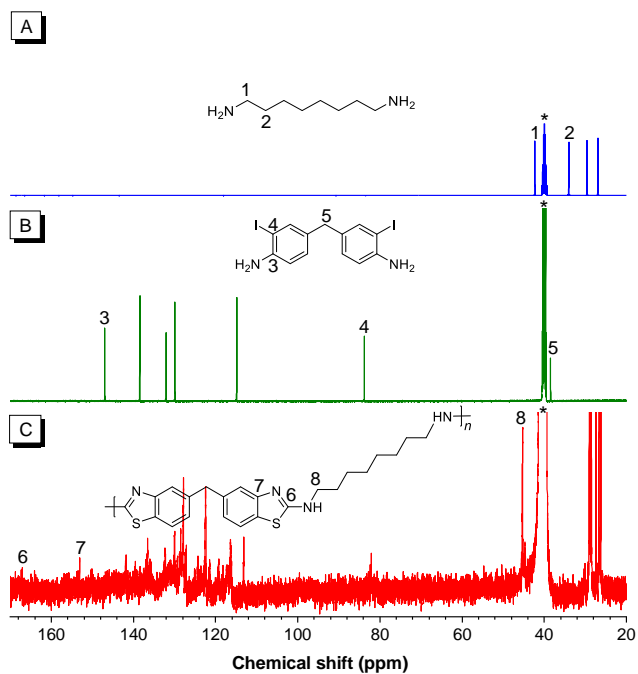

**Fig. S14**  $^{13}\text{C}$  NMR spectra of monomers **1e** (A) and **2** (B), and **P1e/2/CS<sub>2</sub>** (C) in  $\text{DMSO-}d_6$ . The solvent peaks are marked with asterisks.

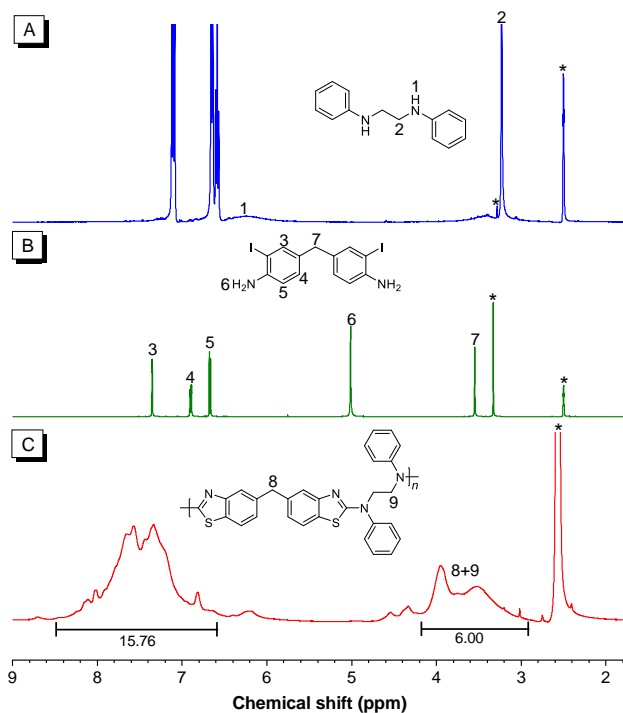

**Fig. S15**  $^1\text{H}$  NMR spectra of monomers **1f** (A) and **2** (B), and **P1f/2/CS<sub>2</sub>** (C) in  $\text{DMSO-}d_6$ . The solvent peaks are marked with asterisks.

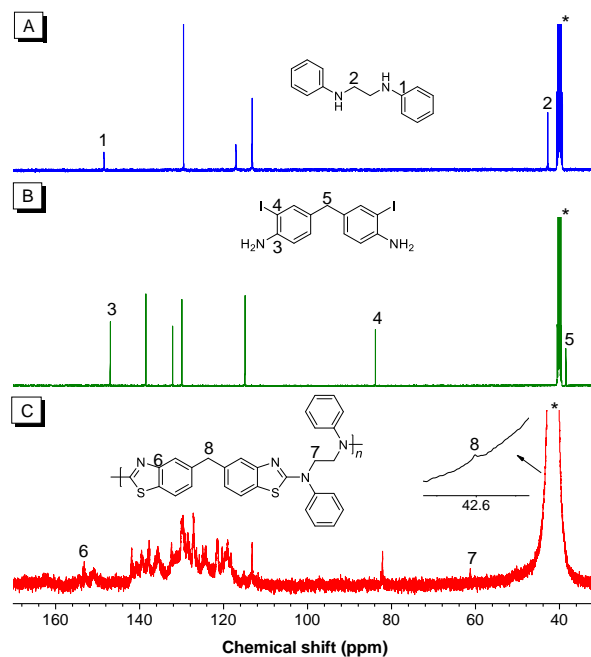

**Fig. S16**  $^{13}\text{C}$  NMR spectra of monomers **1f** (A) and **2** (B), and **P1f/2/CS<sub>2</sub>** (C) in  $\text{DMSO-}d_6$ . The solvent peaks are marked with asterisks.

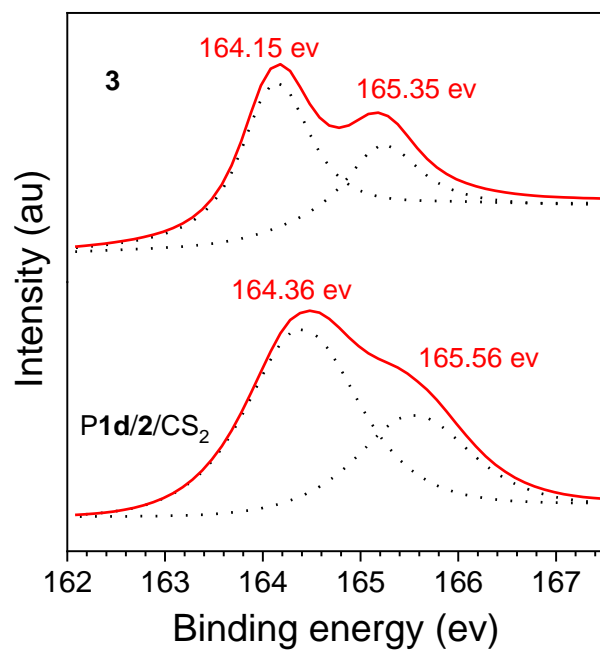

Fig. S17 S 2p XPS of **3** and P1d/2/CS<sub>2</sub>.

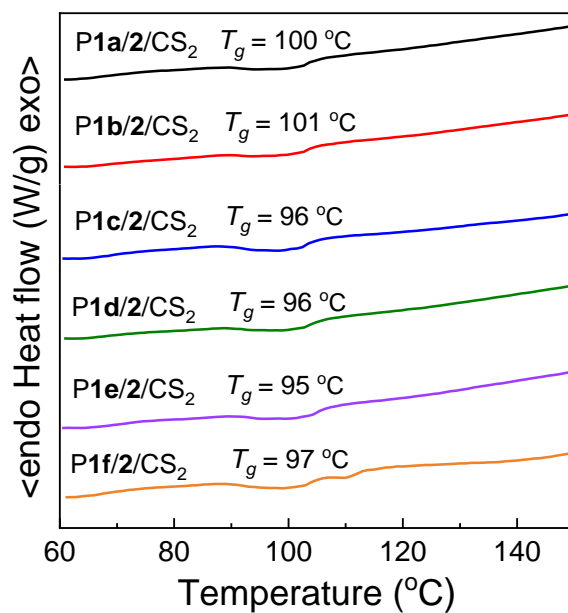

Fig. S18 DSC curves of the PBTs recorded under nitrogen.

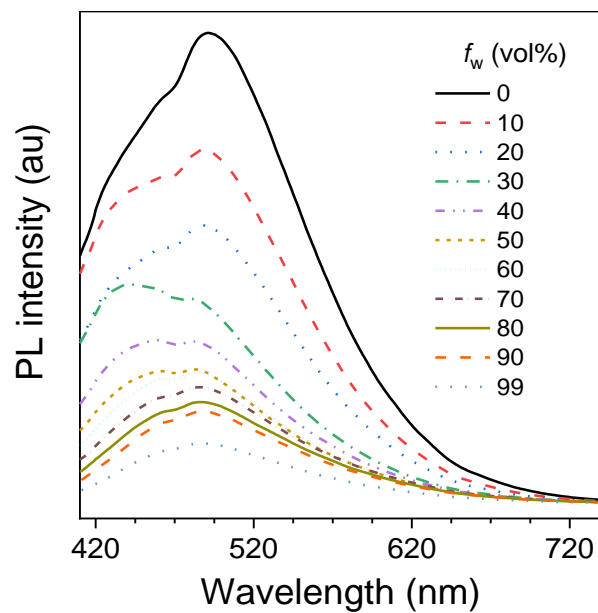

**Fig. S19** PL spectra of P1b/2/CS<sub>2</sub> in DMSO/water mixtures with different water fractions ( $f_w$ ). Solution concentration: 10  $\mu$ M; excitation wavelength: 350 nm.
